# Supplementary material
Source: PubMed Central journal article supplement (PMC4102931)

**Supplementary Fig. 3** Geometric mean plasma concentration of the chemotherapy agents alone and in combination with cediranib (30 mg)

**a** arm 1, **b** arm 2, **c** arm 3 (A and B), and **d** arm 4

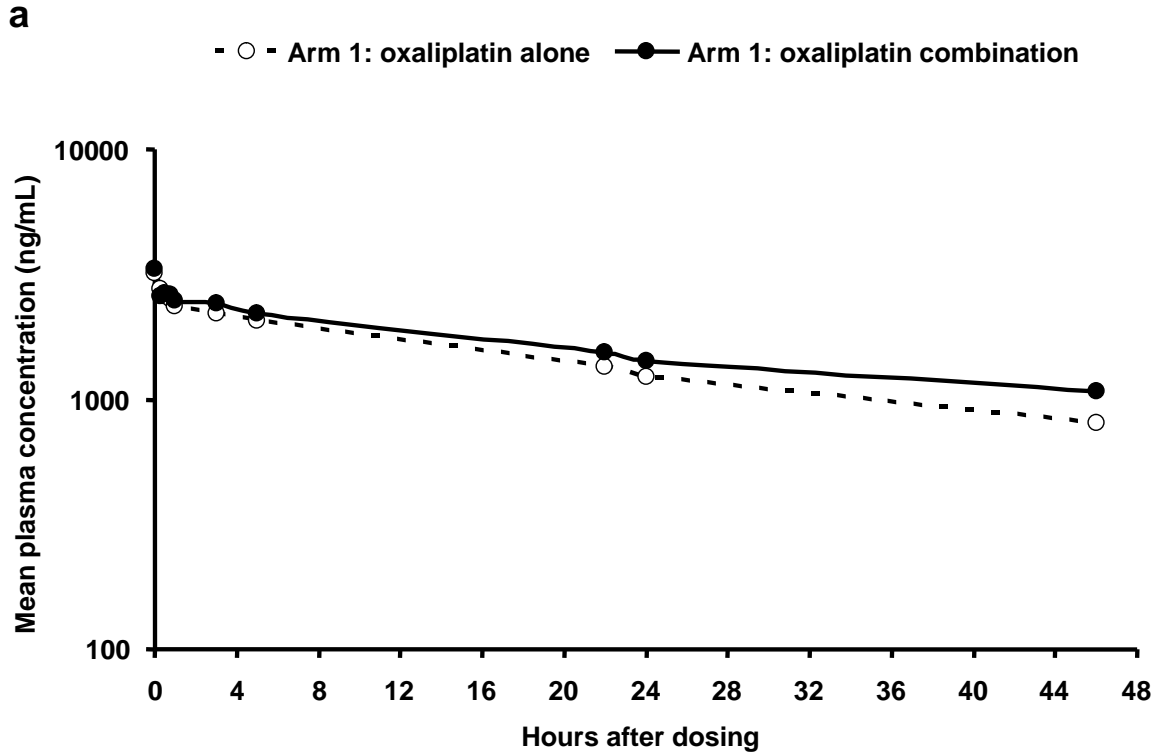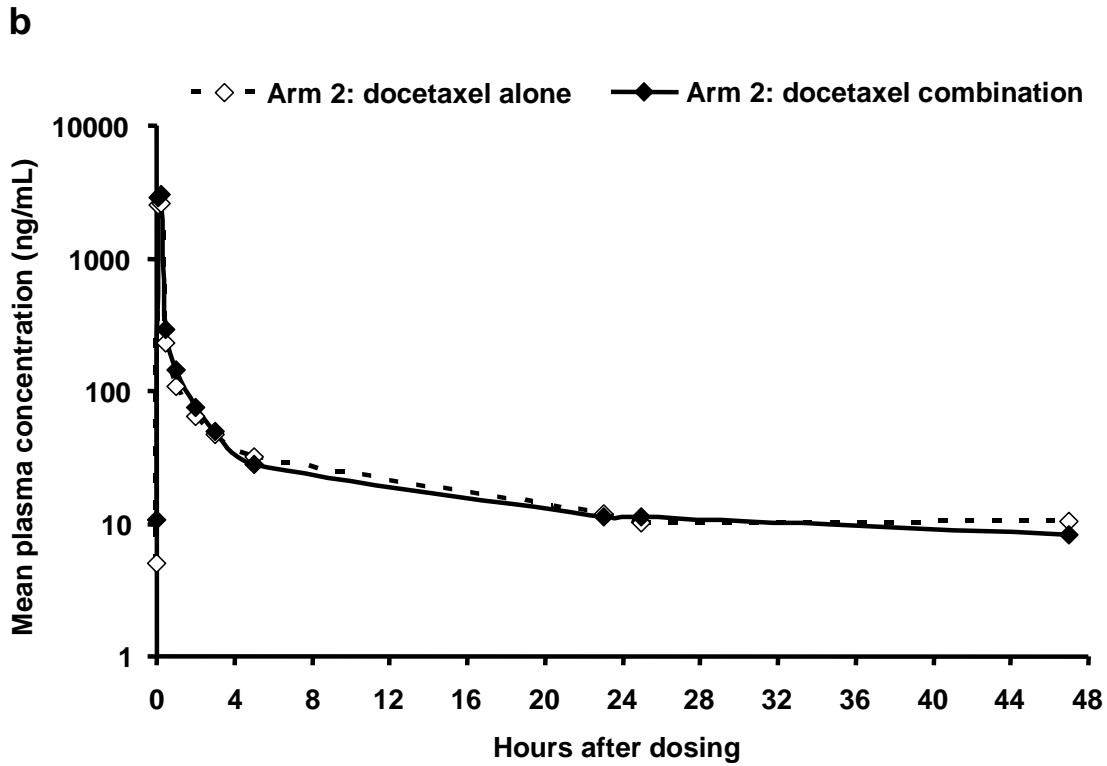

Supplementary Fig. 3

C

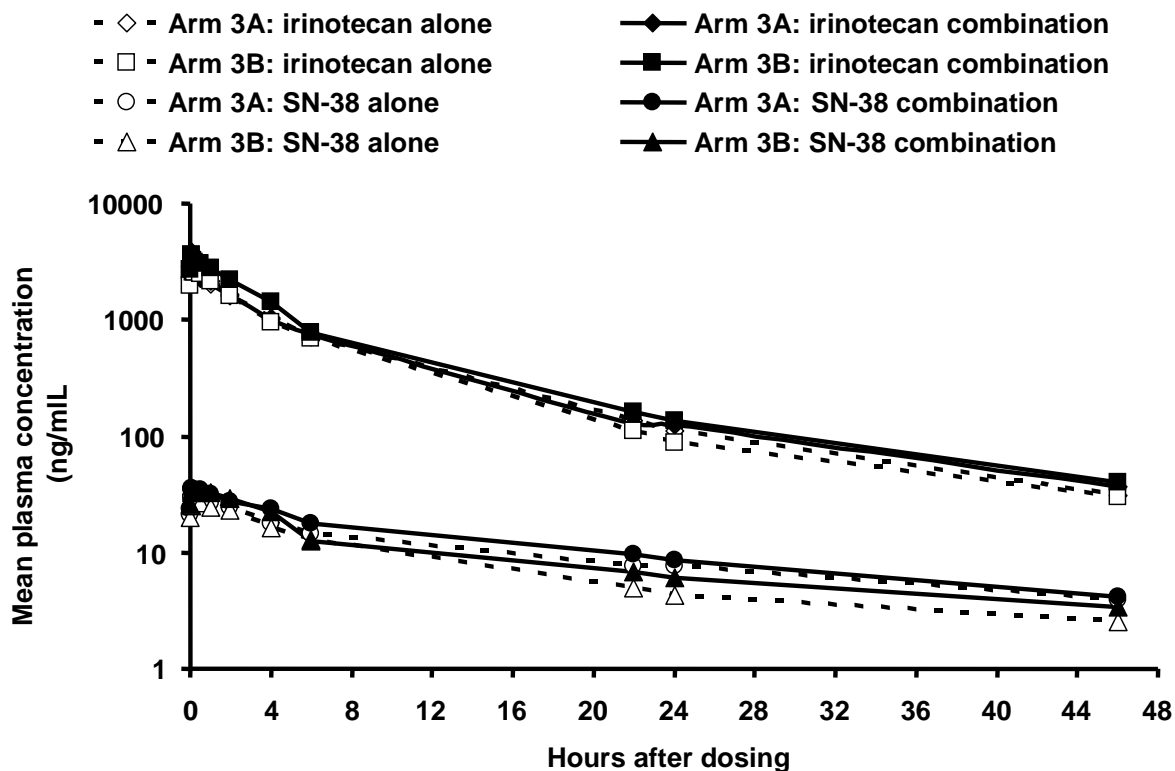

For arm 3B no data were available for chemotherapy in combination with cediranib 30 mg; data are shown for chemotherapy in combination with cediranib 20 mg.

d

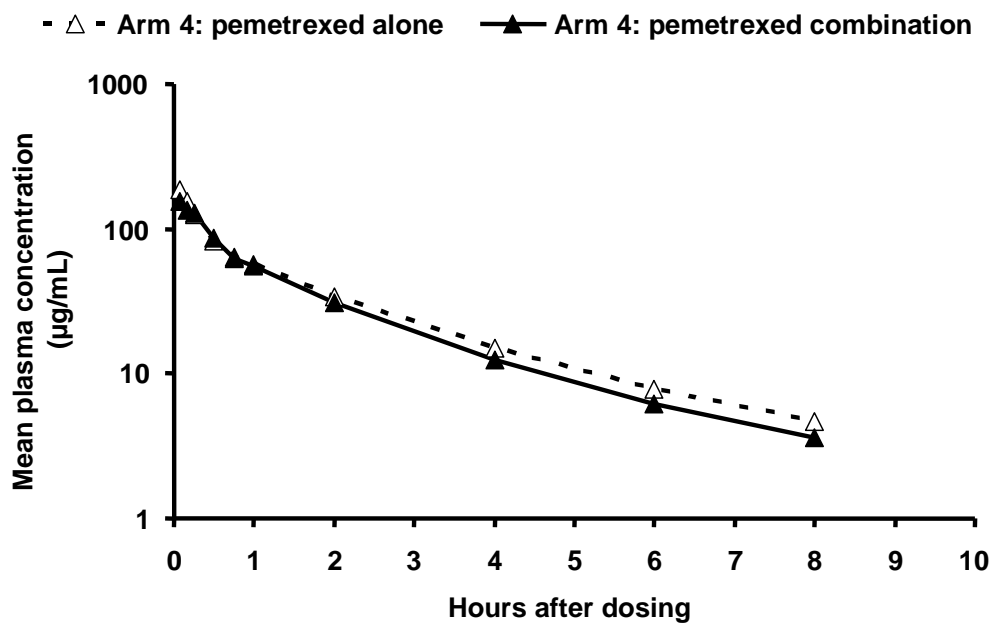

Supplement: NIHMS516203-supplement-Supp_Data.pdf [file NIHMS516203-supplement-Supp_Data.pdf]
